# Supplementary material
Source: publisher figshare collection journal article supplement (https://aacr.figshare.com/articles/dataset/_/23905277)

**Supplemental Figure 6. Chromatin state of different SV regions.** The CT1 region at 1p36.11-1p34.3 is comprised of greater than 74% A-compartment (range 74-100%); CT2 at 1p33-1p32.3 comprises both inactive (range 35-59%) and active chromatin (range 41-65%) and, CT3 at 1p13.3-1p12, overlaps with T11, had greater variability with 86% A-compartment in U266 while only 1% in KMS11. T11 region predominantly laid in B-compartment (range 63-73%) and T12 lay in an almost entirely active compartment (range 91-100%). NBC=Naïve B-cell, MBC=Memory B-cell, GCBC=Germinal Center B-cell, PC=plasma cell.

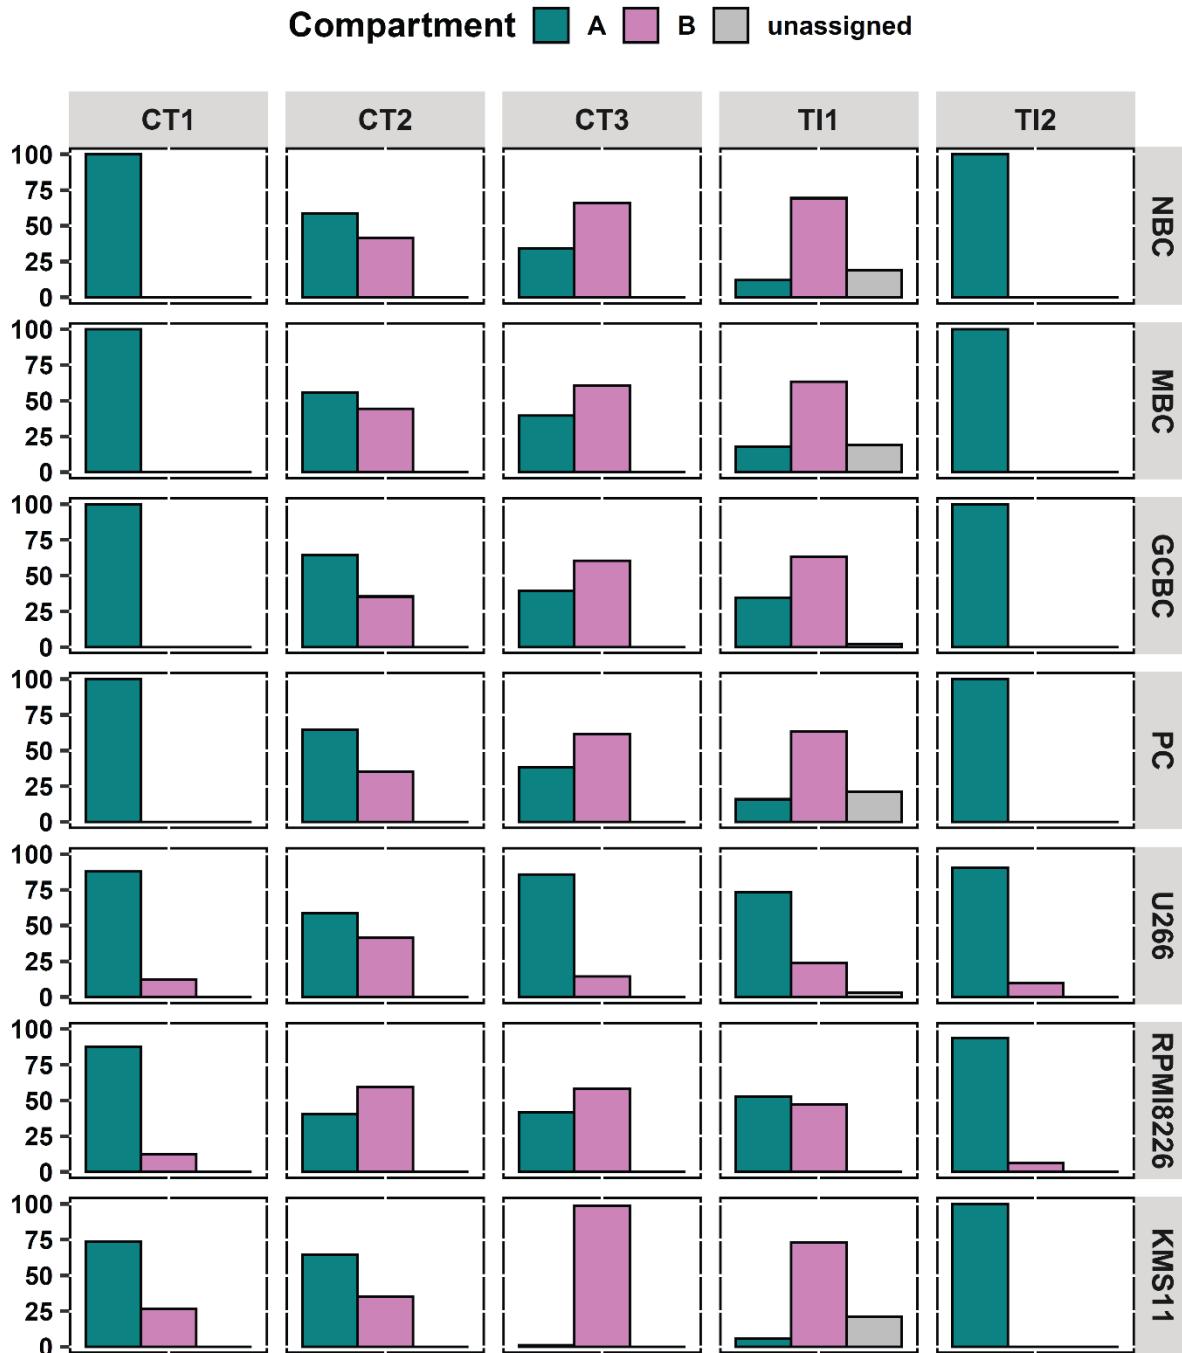

Supplement: Supplementary file 1 [file 41911460]
